# Supplementary material
Source: publisher site journal article supplement (https://static.cambridge.org/content/id/urn:cambridge.org:id:article:S0317167119000362/resource/name/S0317167119000362supp001.pdf)
Supplement: Supplementary file 1 [file S0317167119000362supp001.pdf]

## Supplementary Material: Survey

1. What is your primary centre of practice (Name of Institution, City)? (text box)

2. What is your main clinical area of practice:

- Neonatology
- Pediatric Neurology
- Neurology (adult)
- General Pediatrics
- Other – please specify:

3. What is your current overall level of training or experience:

- Fellow
- Staff (since <10 years)
- Staff (since ≥10 years)

### USE OF EEG MONITORING IN YOUR NICU

4. a) Do you use **any** long term EEG monitoring (amplitude-integrated or conventional EEG) in your NICU?

- Yes (*continue with 4b*)
- No (*continue with 4c, then 14*)

If yes, which:

- aEEG
- cEEG
- combined aEEG/cEEG

4. b) If you use cEEG, does it include video?

- Never
- Sometimes
- Always

4. c) If you don't use any NICU EEG monitoring, why not? Please check all that apply.

- EEG is not available/accessible
- EEG doesn't inform treatment decisions
- Other: (text box)

5. What is the general availability of application setup of each type of long term EEG monitoring in your NICU? (i.e. technician and machine available)

| EEG availability                  | Conventional EEG | Amplitude-integrated EEG |
|-----------------------------------|------------------|--------------------------|
| Always (24 hours/7 days per week) |                  |                          |
| Extended work hours but <24/7     |                  |                          |
| Limited to regular work hours     |                  |                          |
| Unavailable                       |                  |                          |
| Unsure                            |                  |                          |

6. How long does it typically take from time of request to initiate each type of long term EEG monitoring in your NICU during regular work hours?

| EEG accessibility (on average) | Conventional EEG | Amplitude-integrated EEG |
|--------------------------------|------------------|--------------------------|
| Immediately (within 1 hour)    |                  |                          |
| Within 1-4 hours               |                  |                          |
| Within 5-8 hours               |                  |                          |
| Within 9-24 hours              |                  |                          |
| Not routinely accessible       |                  |                          |
| I don't know                   |                  |                          |

7. a) For **how many patients** in your NICU do you typically use each type of long term EEG in a 1-month period?

Please provide an **estimate** and check all that apply.

| Patients per month         | Conventional EEG | Amplitude-integrated EEG | Combined Conventional EEG and Amplitude-integrated EEG |
|----------------------------|------------------|--------------------------|--------------------------------------------------------|
| 0-1                        |                  |                          |                                                        |
| 2-8                        |                  |                          |                                                        |
| 9-14                       |                  |                          |                                                        |
| 15 or more                 |                  |                          |                                                        |
| Unable to provide estimate |                  |                          |                                                        |

7. b) How many patients per month would you monitor with long term EEG if you had unlimited resources?

| Patients per month          | Conventional EEG | Amplitude-integrated EEG | Combined Conventional EEG and Amplitude-integrated EEG |
|-----------------------------|------------------|--------------------------|--------------------------------------------------------|
| 0-1                         |                  |                          |                                                        |
| 2-8                         |                  |                          |                                                        |
| 9-14                        |                  |                          |                                                        |
| 15 or more (please specify) |                  |                          |                                                        |
| Unable to provide estimate  |                  |                          |                                                        |

8. What is the **typical** duration of each type of long term EEG monitoring in your NICU? Please provide an **estimate** and check all that apply.

| Average duration of EEG monitoring | Conventional EEG | Amplitude-integrated EEG | Combined Conventional EEG and Amplitude-integrated EEG |
|------------------------------------|------------------|--------------------------|--------------------------------------------------------|
| Less than 24 hours                 |                  |                          |                                                        |
| 24 hours or longer                 |                  |                          |                                                        |
| Unable to provide estimate         |                  |                          |                                                        |

9. Typically, how often do you check each type of long term EEG monitoring for your NICU patients?

| Checking of EEG results                   | Conventional EEG with or without video | Amplitude-integrated EEG | Combined Conventional EEG and Amplitude-integrated EEG |
|-------------------------------------------|----------------------------------------|--------------------------|--------------------------------------------------------|
| I do not routinely check results          |                                        |                          |                                                        |
| Only when results are officially reported |                                        |                          |                                                        |
| Less than daily                           |                                        |                          |                                                        |
| Daily                                     |                                        |                          |                                                        |
| More than once daily (please specify)     |                                        |                          |                                                        |
| At least once per hour                    |                                        |                          |                                                        |

10. Does your institution have a written protocol for long term EEG monitoring in the NICU?

| Written NICU EEG monitoring protocol | Conventional EEG | Amplitude-integrated EEG (aEEG) | Combined Conventional EEG and Amplitude-integrated EEG |
|--------------------------------------|------------------|---------------------------------|--------------------------------------------------------|
| Yes                                  |                  |                                 |                                                        |
| No                                   |                  |                                 |                                                        |
| I am not sure                        |                  |                                 |                                                        |

11. In which cases do you **regularly (>50% of patients)** use each type of EEG monitoring in your NICU?

Check all that apply.

| Indication              | Conventional EEG | Amplitude-integrated EEG | Combined Conventional EEG and Amplitude-integrated EEG |
|-------------------------|------------------|--------------------------|--------------------------------------------------------|
| Therapeutic hypothermia |                  |                          |                                                        |
| HIE without hypothermia |                  |                          |                                                        |
| Suspected seizures      |                  |                          |                                                        |
| CNS                     |                  |                          |                                                        |

|                               |  |  |  |
|-------------------------------|--|--|--|
| infection                     |  |  |  |
| Other<br>(please<br>specify): |  |  |  |

**YOUR OPINION ON EEG MONITORING**

12. In which percentage of your patients do long term EEG monitoring results inform management decisions in your NICU?

| EEG results inform treatment | Conventional EEG (cEEG) | Amplitude-integrated EEG (aEEG) | Combined Conventional EEG and Amplitude-integrated EEG |
|------------------------------|-------------------------|---------------------------------|--------------------------------------------------------|
| <10%                         |                         |                                 |                                                        |
| 10-50%                       |                         |                                 |                                                        |
| >50%                         |                         |                                 |                                                        |
| Unable to provide estimate   |                         |                                 |                                                        |

13. What is your preferred long term monitoring method for assessing the following clinical scenarios for patients in the NICU, and why:

- a) seizure detection
- b) encephalopathy/EEG background abnormalities

Please check box and comment:

- Conventional EEG, because: (text box)
- Amplitude-integrated EEG, because: (text box)
- Combined Conventional EEG and Amplitude-Integrated EEG, because: (text box)
- I have no preference, because: (text box)

14. Would you like to attend an education session on EEG use in the NICU at your institution? Why or why not?

- Yes
- No
- I am unsure

Why or why not:

15. Do you have any other comments regarding EEG use in the NICU at your institution? Why or why not?

(Text box)
